# Supplementary material for: Developing a self-management package for pulmonary fibrosis: an international Delphi study
Source: PubMed Central journal article supplement — ERJ Open Res. 2022 Dec 27;8(4):00349-2022. doi: 10.1183/23120541.00349-2022 (PMC9793247; doi:10.1183/23120541.00349-2022), 2022-12-27
Supplement: 00349-2022.SUPPLEMENT.pdf [file 00349-2022.SUPPLEMENT.pdf]

## Front page

### **DESIGNING A SELF-MANAGEMENT PACKAGE FOR PULMONARY FIBROSIS: WHAT ARE THE ESSENTIAL COMPONENTS?**

Thank you for your interest in our research study, which aims to achieve consensus regarding which components should be included in a self-management package for pulmonary fibrosis (PF).

Your responses are anonymous and confidential. We will only report group results of the study and in such a way that you will not be identified. Your participation is voluntary, and you are free to withdraw from the study at any stage.

This study is part of a PhD project supported by the National Health and Medical Research Council (NHMRC), Centre of Research Excellence in Pulmonary Fibrosis (CRE-PF). Ethics approval has been received from Monash University with project ID - 27139.

#### **By completing this survey, you agree that:**

- You have read the information provided to you in the invitation email
- You have had an opportunity to ask questions and are satisfied with the answers received
- You understand that you can withdraw from the study at any stage.

#### **You hereby consent to:**

- Take part in this research study
- The use of the information provided by you in this study, which includes reporting of non-identifiable results in a thesis and any publications arising from

the study.

## Introduction

### . INTRODUCTION

This survey includes 2 sections:

**Section 1** relates to self-management topics.

**Section 2** relates to the format and delivery of a self-management package.

### Section 1 explanation

### . SECTION 1

Please indicate how strongly you agree that the following items are essential in a self-management package for people with PF.

**For each item, please respond using the following scale:**

Strongly disagree      Disagree      Neutral      Agree      Strongly  
agree

You are welcome to provide any comments or suggestions regarding each item in the 'Comments' box under each question.

### Q1

. Do you agree that the following items are essential for a PF self-management package?

**. 1. Understanding PF - causes, pathophysiology and symptoms**

Strongly Disagree

Disagree

Neutral

Agree

Strongly agree

. Comments:

**Q2**

. Do you agree that the following items are essential for a PF self-management package?

**. 2. Understanding expected disease course and prognosis**

Strongly disagree

Disagree

Neutral

Agree

Strongly agree

. Comments:

**Q3**

. Do you agree that the following items are essential for a PF self-management package?

.

### 3. Understanding treatment options for PF

Strongly disagree

Disagree

Neutral

Agree

Strongly agree

. Comments:

#### Q4

. Do you agree that the following items are essential for a PF self-management package?

.

### 4. Understanding and accessing clinical trials

Strongly disagree

Disagree

Neutral

Agree

Strongly agree

. Comments:

#### Q5

. Do you agree that the following items are essential for a PF self-management package?

.  
**5. Managing medications (including side effects)**

Strongly disagree

Disagree

Neutral

Agree

Strongly agree

. Comments:

**Q6**

. Do you agree that the following items are essential for a PF self-management package?

.  
**6. Managing cough**

Strongly disagree

Disagree

Neutral

Agree

Strongly agree

. Comments:

**Q7**

. Do you agree that the following items are essential for a PF self-management package?

## 7. Managing shortness of breath

Strongly disagree

Disagree

Neutral

Agree

Strongly agree

. Comments:

## Q8

. Do you agree that the following items are essential for a PF self-management package?

## 8. Managing fatigue

Strongly disagree

Disagree

Neutral

Agree

Strongly agree

. Comments:

## Q9

. Do you agree that the following items are essential for a PF self-management package?

### 9. Role and importance of pulmonary rehabilitation

Strongly disagree

Disagree

Neutral

Agree

Strongly agree

. Comments:

### Q10

. Do you agree that the following items are essential for a PF self-management package?

### 10. Role of oxygen therapy

Strongly disagree

Disagree

Neutral

Agree

Strongly agree

. Comments:

**Q11**

. Do you agree that the following items are essential for a PF self-management package?

**11. Managing oxygen therapy**

Strongly disagree

Disagree

Neutral

Agree

Strongly agree

. Comments:

**Q12**

. Do you agree that the following items are essential for a PF self-management package?

**12. Role and importance of vaccinations**

Strongly disagree

Disagree

Neutral

Agree

Strongly agree

. Comments:



**Q13**

. Do you agree that the following items are essential for a PF self-management package?

.

**13. Recognising and managing an exacerbation**

Strongly disagree

Disagree

Neutral

Agree

Strongly agree

. Comments:

**Q14**

. Do you agree that the following items are essential for a PF self-management package?

.

**14. Reducing the risk of an exacerbation**

Strongly disagree

Disagree

Neutral

Agree

Strongly agree

. Comments:

**Q15**

. Do you agree that the following items are essential for a PF self-management package?

.

**15. Using an action plan**

Strongly disagree

Disagree

Neutral

Agree

Strongly agree

. Comments:

**Q16**

. Do you agree that the following items are essential for a PF self-management package?

.

**16. Role and importance of regular physical activity**

Strongly disagree

Disagree

Neutral

Agree

Strongly agree

. Comments:

**Q17**

. Do you agree that the following items are essential for a PF self-management package?

**17. Nutrition and dietary advice**

Strongly disagree

Disagree

Neutral

Agree

Strongly agree

. Comments:

**Q18**

. Do you agree that the following items are essential for a PF self-management package?

**18. Smoking cessation advice and support**

Strongly disagree

Disagree

Neutral

Agree

Strongly agree

. Comments:

**Q19**

. Do you agree that the following items are essential for a PF self-management package?

**19. Managing activities of daily living**

Strongly disagree

Disagree

Neutral

Agree

Strongly agree

. Comments:

**Q20**

. Do you agree that the following items are essential for a PF self-management package?

**20. Managing comorbid medical conditions**

Strongly disagree

Disagree

Neutral

Agree

Strongly agree

. Comments:

**Q21**

. Do you agree that the following items are essential for a PF self-management package?

**21. Managing mood (e.g. anxious or depressed feelings)**

Strongly disagree

Disagree

Neutral

Agree

Strongly agree

. Comments:

**Q22**

. Do you agree that the following items are essential for a PF self-management package?

**22. Role and importance of social support**

Strongly disagree

Disagree

Neutral

Agree

Strongly agree

. Comments:

**Q23**

. Do you agree that the following items are essential for a PF self-management package?

.

**23. Accessing peer support**

Strongly disagree

Disagree

Neutral

Agree

Strongly agree

. Comments:

**Q24**

. Do you agree that the following items are essential for a PF self-management package?

.

**24. Accessing community support**

Strongly disagree

Disagree

Neutral

Agree

Strongly agree

. Comments:

**Q25**

. Do you agree that the following items are essential for a PF self-management package?

.

**25. Advance care planning and advance directives**

Strongly disagree

Disagree

Neutral

Agree

Strongly agree

. Comments:

**Q26**

. Do you agree that the following items are essential for a PF self-management package?

.

**26. Accessing reliable information about PF**

Strongly disagree

Disagree

Neutral

Agree

Strongly agree

. Comments:

**Q27**

.  
Are there any other components that you think should be included in a self-management package to support people with PF in managing their health?

Yes

No

.  
If you answered 'yes', please provide some more details in the comments box below.

**Section 2 explanation**

. **SECTION 2**

The following questions relate to the format and delivery of a self-management package for people with PF.

**Q1**



. Do you agree with the following statements?

.  
**1. The components of a self-management package must be tailored to each specific PF diagnosis (e.g. IPF, HP, CT-ILD)**

Strongly disagree

Disagree

Neutral

Agree

Strongly agree

. Comments:

**Q2**

. Do you agree with the following statements?

. **2. The self-management component/s delivered to the patient must be tailored to their specific needs**

Strongly disagree

Disagree

Neutral

Agree

Strongly agree

. Comments:

**Q3**

. Do you agree with the following statements?

.  
**3. A self-management package must be delivered with support from a healthcare professional (e.g. using telehealth or face-to-face consultations)**

Strongly disagree

Disagree

Neutral

Agree

Strongly agree

. Comments:

**Q4**

.  
Do you agree with the following statements?

.  
**4. A self-management package must be delivered by a multidisciplinary team**

Strongly disagree

Disagree

Neutral

Agree

Strongly agree

. Comments:

**Q5**

. Do you agree with the following statements?

.  
**5. A self-management package for PF can be effectively delivered using independent and self-paced learning**

Strongly disagree

Disagree

Neutral

Agree

Strongly agree

. Comments:

**Q6**

.  
Do you agree with the following statements?

.  
**6. A self-management package for PF can be effectively delivered remotely (e.g. via an app or website)**

Strongly disagree

Disagree

Neutral

Agree

Strongly agree

. Comments:

**Q7**

. Do you agree with the following statements?

**7. Goal setting and feedback are essential for effective self-management in PF**

Strongly disagree

Disagree

Neutral

Agree

Strongly agree

. Comments:

**Q8**

. Do you agree with the following statements?

**8. Patient access to personal health information (e.g. lung function results, step counts) is essential for effective self-management in PF**

Strongly disagree

Disagree

Neutral

Agree

Strongly agree

. Comments:

**Q9**

Do you have any other comments about the format or delivery of a self-management package for people with PF?

Yes

No

If you answered 'yes', please provide some more details in the comments box below.

**Demographics****DEMOGRAPHICS**

Please answer the following questions about yourself.

**1. Please indicate your gender**

Male

Female

**2. Please indicate your age**

Less than 25 years

25 - 35 years

36 - 45 years

46 - 55 years

Greater than 55  
years

### 3. Please indicate your work role/s (choose all that applies)

- Physician
- Nurse
- Researcher
- Allied Health Professional - please specify
- Other - please specify

### 4. Please indicate which area of the world that you practice in

- Australia / New Zealand  Europe  North America  South America  Asia  Africa

### 5. What is your experience in providing care to people with PF?

- Less than 5 years  6 - 10 years  11 - 25 years  More than 25 years  I don't provide direct patient care

Powered by Qualtrics
